# Supplementary material
Source: publisher figshare collection journal article supplement (https://diabetesjournals.figshare.com/articles/dataset/_/17052590)
Supplement: Supplementary file 3 [file 1]

**SUPPLEMENTAL TABLE 1A. Unadjusted and Model Adjusted Mean HbA<sub>1c</sub> by Age Group and Study Period.**

| Age                                                                                                                                                                                             | Cohort    | Type 1               |                         | Type 2               |                         |
|-------------------------------------------------------------------------------------------------------------------------------------------------------------------------------------------------|-----------|----------------------|-------------------------|----------------------|-------------------------|
|                                                                                                                                                                                                 |           | Unadjusted mean (SE) | Least squares mean (SE) | Unadjusted mean (SE) | Least squares mean (SE) |
| 1-9                                                                                                                                                                                             | 2002-2007 | 8.15 (0.03)          | 8.32 (0.06)             |                      |                         |
|                                                                                                                                                                                                 | 2008-2013 | 8.22 (0.06)          | 8.37 (0.09)             |                      |                         |
|                                                                                                                                                                                                 | 2014-2019 | 8.38 (0.10)          | 8.42 (0.14)             |                      |                         |
| 10-14                                                                                                                                                                                           | 2002-2007 | 8.47 (0.04)          | 8.57 (0.05)             | 8.40 (0.28)          | 8.66 (0.28)             |
|                                                                                                                                                                                                 | 2008-2013 | 8.75 (0.06)          | 8.89 (0.06)             | 7.70 (0.33)          | 8.11 (0.36)             |
|                                                                                                                                                                                                 | 2014-2019 | 9.09 (0.09)          | 9.05 (0.08)             | 7.59 (0.31)          | 8.37 (0.36)             |
| 15-19                                                                                                                                                                                           | 2002-2007 | 8.77 (0.06)          | 8.79 (0.05)             | 8.17 (0.19)          | 8.60 (0.18)             |
|                                                                                                                                                                                                 | 2008-2013 | 9.29 (0.08)          | 9.31 (0.06)             | 8.12 (0.25)          | 8.26 (0.21)             |
|                                                                                                                                                                                                 | 2014-2019 | 9.49 (0.09)          | 9.32 (0.07)             | 8.47 (0.22)          | 8.76 (0.20)             |
| 20-24                                                                                                                                                                                           | 2002-2007 | 8.54 (0.13)          | 8.33 (0.12)             | 9.10 (0.35)          | 9.38 (0.32)             |
|                                                                                                                                                                                                 | 2008-2013 | 9.07 (0.11)          | 8.92 (0.08)             | 8.92 (0.29)          | 8.55 (0.24)             |
|                                                                                                                                                                                                 | 2014-2019 | 8.97 (0.09)          | 8.66 (0.08)             | 9.06 (0.22)          | 8.68 (0.20)             |
| 25+                                                                                                                                                                                             | 2008-2013 | 8.44 (0.34)          | 8.21 (0.24)             | 8.25 (0.45)          | 8.08 (0.39)             |
|                                                                                                                                                                                                 | 2014-2019 | 8.44 (0.15)          | 7.91 (0.12)             | 9.66 (0.25)          | 8.58 (0.32)             |
| <i>Longitudinal models stratified by diabetes type, adjusting for clinical site, age, sex, race/ethnicity, health insurance status, household income, insulin regimen, and disease duration</i> |           |                      |                         |                      |                         |

**SUPPLEMENTAL TABLE 1B. Study Period Differences in Mean HbA<sub>1c</sub> by Diabetes Type and Age Group.**

| Diabetes Type    | Age   | Period    | 2008-2013 | 2014-2019 |
|------------------|-------|-----------|-----------|-----------|
| Type 1           | 1-9   | 2002-2007 | 0.5814    | 0.4733    |
|                  |       | 2008-2013 |           | 0.7432    |
|                  | 10-14 | 2002-2007 | <0.0001*  | <0.0001*  |
|                  |       | 2008-2013 |           | 0.1031    |
|                  | 15-19 | 2002-2007 | <0.0001*  | <0.0001*  |
|                  |       | 2008-2013 |           | 0.9248    |
|                  | 20-24 | 2002-2007 | <0.0001*  | 0.0156*   |
|                  |       | 2008-2013 |           | 0.0163*   |
|                  | 25+   | 2008-2013 |           | 0.2489    |
| Type 2           | 10-14 | 2002-2007 | 0.1837    | 0.4882    |
|                  |       | 2008-2013 |           | 0.5931    |
|                  | 15-19 | 2002-2007 | 0.1954    | 0.5302    |
|                  |       | 2008-2013 |           | 0.0730    |
|                  | 20-24 | 2002-2007 | 0.0391*   | 0.0668    |
|                  |       | 2008-2013 |           | 0.6563    |
|                  | 25+   | 2008-2013 |           | 0.2343    |
| * <i>p</i> <0.05 |       |           |           |           |
